# Supplementary material for: Manganese matere bonds in biological systems: PDB inspection and DFT calculations
Source: Royal Society of Chemistry journal article supplement (doi:10.1039/d4cp01701c), 2024-01-01
Supplement: d4cp01701c1.pdf [file d4cp01701c1.pdf]

## Electronic Supporting Information

### Manganese Matere Bonds in biological systems: PDB inspection and DFT calculations

Sergi Burguera,<sup>a</sup> Akshay Kumar Sahu,<sup>b,c</sup> Michael Jordan Chávez Romero,<sup>a</sup>  
Himansu S. Biswal<sup>\*,b,c</sup> and Antonio Bauzá<sup>\*,a</sup>

<sup>a</sup>Department of Chemistry, Universitat de les Illes Balears, Crta. de Valldemossa km 7.5,  
07122 Palma (Balears), SPAIN; Fax: (+) 34 971 173426; E-mail: [antonio.bauza@uib.es](mailto:antonio.bauza@uib.es)

<sup>b</sup>School of Chemical Sciences, National Institute of Science Education and Research  
(NISER), PO-Bhimpur-Padanpur, Via-Jatni, District- Khurda, PIN - 752050,  
Bhubaneswar, India. E-mail: [himansu@niser.ac.in](mailto:himansu@niser.ac.in)

<sup>c</sup>Homi Bhabha National Institute, Training School Complex, Anushakti Nagar, Mumbai  
400094, India.

**Table S1.** List of PDB codes (PDBID), coordinated ligands (L<sub>1</sub> to L<sub>4</sub>), interacting partner (LB), intermolecular Mn⋯LB distance (d, in Å) and L–Mn⋯LB angle (α, in degrees).

| PDBID | L <sub>1</sub> | L <sub>2</sub> | L <sub>3</sub> | L <sub>4</sub> | LB  | d     | α     |
|-------|----------------|----------------|----------------|----------------|-----|-------|-------|
| 6EZJ  | HIS            | GLU            | HIS            | HIS            | 5LD | 2.803 | 158.3 |
| 1WBL  | GLU            | ASP            | ASP            | HOH            | HIS | 2.804 | 164.2 |
| 6ILB  | HIS            | SER            | ASP            | HIS            | GLU | 2.836 | 170.8 |
| 4XSM  | GLU            | ASP            | HIS            | TLZ            | GLU | 2.892 | 161.1 |
| 4M0V  | ASP            | HIS            | ASP            | HOH            | HIS | 2.906 | 166.8 |
| 6B8W  | GLU            | HIS            | TYR            | HOH            | HIS | 2.961 | 163.8 |
| 2BAN  | ASP            | GLU            | ASP            | HOH            | GLY | 2.970 | 166.7 |
| 2P7P  | HIS            | HIS            | GLU            | SO4            | TYR | 3.041 | 170.0 |
| 5NMP  | HIS            | HIS            | ASP            | SIN            | GLN | 3.122 | 169.7 |
| 4O4K  | ASP            | HIS            | ASP            | HIS            | HIS | 3.164 | 167.9 |
| 1YNY  | HIS            | HIS            | ASP            | HOH            | LYS | 3.229 | 168.7 |
| 7Y1T  | SER            | SER            | ASP            | GLN            | GLU | 3.317 | 174.4 |
| 3BG5  | ASP            | LYS            | HIS            | HIS            | PYR | 3.391 | 166.5 |
| 1OG0  | CYS            | HIS            | GLU            | ASP            | ARG | 3.395 | 168.3 |
| 3F2C  | HIS            | HIS            | GLU            | ASN            | CYS | 3.499 | 169.3 |
| 5OEY  | GLU            | ASP            | GLU            | PO4            | ASP | 3.549 | 172.0 |
| 1LU2  | GLU            | ASP            | ASP            | HIS            | SER | 3.591 | 176.6 |
| 8ICT  | DG             | ASP            | ASP            | DCP            | ASP | 3.643 | 168.1 |
| 1KFL  | CYS            | HIS            | GLU            | ASP            | ARG | 3.646 | 162.6 |

|      |     |     |     |     |     |       |       |
|------|-----|-----|-----|-----|-----|-------|-------|
| 1RIT | GLU | ASP | ASP | HIS | VAL | 3.684 | 158.5 |
| 5ZT0 | ASP | HIS | ASP | PO4 | HIS | 3.697 | 160.7 |
| 7MPQ | ASP | GLU | ASP | 5GP | TYR | 3.733 | 172.3 |
| 5D09 | CYS | HIS | GLU | ASP | ARG | 3.753 | 162.7 |
| 2DVF | GLU | ASP | ASP | HIS | VAL | 3.834 | 169.2 |
| 6TVV | ASP | ASP | HIS | ASP | ASP | 3.840 | 170.4 |
| 5CZ0 | CYS | HIS | GLU | ASP | ARG | 3.841 | 160.1 |
| 4D69 | GLU | ASP | ASP | HIS | ILE | 3.860 | 175.0 |
| 5DCD | CYS | HIS | GLU | ASP | ARG | 3.872 | 174.1 |
| 3DKY | HIS | ASP | HIS | HIS | HIS | 3.912 | 171.9 |
| 1V60 | GLU | ASP | ASP | HIS | VAL | 3.928 | 162.0 |
| 6S2U | HIS | HIS | ASP | ASP | TYR | 3.957 | 161.5 |
| 7ZR1 | ASP | HIS | ASP | HIS | HIS | 3.982 | 167.2 |
| 5FPL | LEU | LEU | THR | GLU | VAL | 4.024 | 167.0 |
| 3NQW | HIS | HIS | ASP | ASP | ASN | 4.055 | 158.8 |
| 1MSD | HIS | HIS | ASP | HIS | GLN | 4.057 | 174.6 |
| 5FY9 | ASN | LEU | THR | GLU | VAL | 4.058 | 169.0 |
| 5O5L | ASP | ILE | ASP | ONM | PHE | 4.137 | 167.2 |
| 4GBW | ASP | ASP | GLU | PO4 | GLU | 4.141 | 175.7 |
| 4YTQ | GLU | ASP | HIS | GLU | HIS | 4.148 | 176.4 |
| 1LUL | GLU | ASP | ASP | HIS | ILE | 4.206 | 169.7 |
| 2A8R | GLU | GLU | GLU | POP | ASP | 4.328 | 178.6 |
| 4K20 | GLU | ASP | ASP | HIS | VAL | 4.387 | 167.9 |
| 8AMU | HIS | ASP | HIS | HIS | TYR | 4.571 | 163.7 |

Cartesian coordinates of the PDB models regarding 2P7P, 3BG5 and 3DKY structures

### 2P7P

```

C      5.8160000   -7.2650000   24.8380000
C      6.1870000   -7.9340000   26.1230000
N      6.4580000   -7.2310000   27.2760000
C      6.3350000   -9.2440000   26.4360000
C      6.7590000   -8.0780000   28.2440000
N      6.6920000   -9.3050000   27.7610000
C     14.0500000  -13.6220000   23.0810000
C     13.1560000  -12.4040000   22.8770000
O     11.9390000  -12.5440000   22.7840000
N     13.7460000  -11.2150000   22.8260000
C     12.9660000   -9.9940000   22.6410000
C     13.3280000   -9.2940000   21.3540000
O     14.4950000   -9.0670000   21.0690000
C     13.1540000   -9.0380000   23.8190000
C     12.5760000   -9.5590000   25.1140000
C     13.3190000  -10.3960000   25.9470000
C     11.2770000   -9.2390000   25.4930000

```

|    |            |             |            |
|----|------------|-------------|------------|
| C  | 12.7750000 | -10.9000000 | 27.1310000 |
| C  | 10.7220000 | -9.7370000  | 26.6640000 |
| C  | 11.4770000 | -10.5670000 | 27.4800000 |
| O  | 10.9240000 | -11.0610000 | 28.6430000 |
| N  | 12.3100000 | -8.9460000  | 20.5790000 |
| C  | 12.5230000 | -8.3070000  | 19.2880000 |
| C  | 9.2620000  | -12.9240000 | 25.2700000 |
| C  | 8.8380000  | -12.8210000 | 26.7340000 |
| O  | 7.9730000  | -11.9710000 | 27.0570000 |
| O  | 9.3710000  | -13.5950000 | 27.5660000 |
| C  | 2.1600000  | -14.2820000 | 29.3640000 |
| C  | 3.5820000  | -13.8330000 | 29.2420000 |
| N  | 4.5910000  | -14.6660000 | 28.8140000 |
| C  | 4.1590000  | -12.6310000 | 29.4690000 |
| C  | 5.7310000  | -13.9980000 | 28.7840000 |
| N  | 5.4960000  | -12.7600000 | 29.1770000 |
| Mn | 7.3710000  | -11.1630000 | 28.8930000 |
| S  | 7.0340000  | -10.6650000 | 32.1730000 |
| O  | 8.4990000  | -10.8200000 | 32.2390000 |
| O  | 6.6360000  | -9.4440000  | 32.9000000 |
| O  | 6.6320000  | -10.5760000 | 30.7490000 |
| O  | 6.3650000  | -11.8200000 | 32.7970000 |
| H  | 15.1263779 | -13.3991425 | 23.0545906 |
| H  | 14.2295585 | -8.8200820  | 23.9202719 |
| H  | 12.6699983 | -8.0814202  | 23.5612822 |
| H  | 10.6739559 | -8.5884475  | 24.8513603 |
| H  | 14.3444582 | -10.6567106 | 25.6722660 |
| H  | 9.6901623  | -9.5180514  | 26.9460222 |
| H  | 13.3542135 | -11.5497024 | 27.7901319 |
| H  | 10.7285814 | -12.0067007 | 28.5104798 |
| H  | 11.9212645 | -10.3392226 | 22.6196211 |
| H  | 13.5243505 | -7.8595150  | 19.2992801 |
| H  | 6.6302049  | -6.6257891  | 24.4601360 |
| H  | 5.6052206  | -8.0261492  | 24.0762669 |
| H  | 6.4187580  | -6.2228303  | 27.3611787 |
| H  | 6.2601720  | -10.1402494 | 25.8259546 |
| H  | 6.9962610  | -7.8155637  | 29.2740011 |
| H  | 10.2142552 | -12.3894036 | 25.1300239 |
| H  | 9.4400313  | -13.9759318 | 25.0150794 |
| H  | 1.5335493  | -13.4358647 | 29.6744375 |
| H  | 2.0416807  | -15.0780522 | 30.1170848 |
| H  | 4.4686294  | -15.6433306 | 28.5805556 |
| H  | 3.7340077  | -11.6997942 | 29.8337143 |
| H  | 6.7006894  | -14.3928652 | 28.4766577 |
| H  | 4.9158335  | -6.6390940  | 24.9468305 |
| H  | 1.7665130  | -14.6597229 | 28.4064800 |
| H  | 8.5198683  | -12.4794411 | 24.5934599 |
| H  | 13.7959246 | -14.0639614 | 24.0553039 |
| H  | 13.8041027 | -14.3622385 | 22.3081881 |
| H  | 12.4770111 | -9.0364200  | 18.4626616 |
| H  | 11.7684646 | -7.5258381  | 19.1171745 |
| H  | 11.3828817 | -9.2753796  | 20.8130630 |
| H  | 14.7528938 | -11.1255468 | 22.7626296 |

## 2P7P-H substitution of the OH phenolic group

|    |             |              |             |
|----|-------------|--------------|-------------|
| C  | 5.81600000  | -7.26500000  | 24.83800000 |
| C  | 6.18700000  | -7.93400000  | 26.12300000 |
| N  | 6.45800000  | -7.23100000  | 27.27600000 |
| C  | 6.33500000  | -9.24400000  | 26.43600000 |
| C  | 6.75900000  | -8.07800000  | 28.24400000 |
| N  | 6.69200000  | -9.30500000  | 27.76100000 |
| C  | 14.05000000 | -13.62200000 | 23.08100000 |
| C  | 13.15600000 | -12.40400000 | 22.87700000 |
| O  | 11.93900000 | -12.54400000 | 22.78400000 |
| N  | 13.74600000 | -11.21500000 | 22.82600000 |
| C  | 12.96600000 | -9.99400000  | 22.64100000 |
| C  | 13.32800000 | -9.29400000  | 21.35400000 |
| O  | 14.49500000 | -9.06700000  | 21.06900000 |
| C  | 13.15400000 | -9.03800000  | 23.81900000 |
| C  | 12.57600000 | -9.55900000  | 25.11400000 |
| C  | 13.31900000 | -10.39600000 | 25.94700000 |
| C  | 11.27700000 | -9.23900000  | 25.49300000 |
| C  | 12.77500000 | -10.90000000 | 27.13100000 |
| C  | 10.72200000 | -9.73700000  | 26.66400000 |
| C  | 11.47700000 | -10.56700000 | 27.48000000 |
| N  | 12.31000000 | -8.94600000  | 20.57900000 |
| C  | 12.52300000 | -8.30700000  | 19.28800000 |
| C  | 9.26200000  | -12.92400000 | 25.27000000 |
| C  | 8.83800000  | -12.82100000 | 26.73400000 |
| O  | 7.97300000  | -11.97100000 | 27.05700000 |
| O  | 9.37100000  | -13.59500000 | 27.56600000 |
| C  | 2.16000000  | -14.28200000 | 29.36400000 |
| C  | 3.58200000  | -13.83300000 | 29.24200000 |
| N  | 4.59100000  | -14.66600000 | 28.81400000 |
| C  | 4.15900000  | -12.63100000 | 29.46900000 |
| C  | 5.73100000  | -13.99800000 | 28.78400000 |
| N  | 5.49600000  | -12.76000000 | 29.17700000 |
| Mn | 7.37100000  | -11.16300000 | 28.89300000 |
| S  | 7.03400000  | -10.66500000 | 32.17300000 |
| O  | 8.49900000  | -10.82000000 | 32.23900000 |
| O  | 6.63600000  | -9.44400000  | 32.90000000 |
| O  | 6.63200000  | -10.57600000 | 30.74900000 |
| O  | 6.36500000  | -11.82000000 | 32.79700000 |
| H  | 15.12637790 | -13.39914250 | 23.05459060 |
| H  | 14.22955850 | -8.82008200  | 23.92027190 |
| H  | 12.66999830 | -8.08142020  | 23.56128220 |
| H  | 10.67395590 | -8.58844750  | 24.85136030 |
| H  | 14.34445820 | -10.65671060 | 25.67226600 |
| H  | 9.69016230  | -9.51805140  | 26.94602220 |
| H  | 13.35421350 | -11.54970240 | 27.79013190 |
| H  | 11.92126450 | -10.33922260 | 22.61962110 |
| H  | 13.52435050 | -7.85951500  | 19.29928010 |
| H  | 6.63020490  | -6.62578910  | 24.46013600 |
| H  | 5.60522060  | -8.02614920  | 24.07626690 |
| H  | 6.41875800  | -6.22283030  | 27.36117870 |
| H  | 6.26017200  | -10.14024940 | 25.82595460 |
| H  | 6.99626100  | -7.81556370  | 29.27400110 |
| H  | 10.21425520 | -12.38940360 | 25.13002390 |
| H  | 9.44003130  | -13.97593180 | 25.01507940 |
| H  | 1.53354930  | -13.43586470 | 29.67443750 |
| H  | 2.04168070  | -15.07805220 | 30.11708480 |
| H  | 4.46862940  | -15.64333060 | 28.58055560 |
| H  | 3.73400770  | -11.69979420 | 29.83371430 |
| H  | 6.70068940  | -14.39286520 | 28.47665770 |
| H  | 4.91583350  | -6.63909400  | 24.94683050 |
| H  | 1.76651300  | -14.65972290 | 28.40648000 |

|   |             |              |             |
|---|-------------|--------------|-------------|
| H | 8.51986830  | -12.47944110 | 24.59345990 |
| H | 13.79592460 | -14.06396140 | 24.05530390 |
| H | 13.80410270 | -14.36223850 | 22.30818810 |
| H | 12.47701110 | -9.03642000  | 18.46266160 |
| H | 11.76846460 | -7.52583810  | 19.11717450 |
| H | 11.38288170 | -9.27537960  | 20.81306300 |
| H | 14.75289380 | -11.12554680 | 22.76262960 |
| H | 11.04800089 | -10.95022886 | 28.38221694 |

### 3BG5

|    |            |            |            |
|----|------------|------------|------------|
| C  | 50.3860000 | 75.6220000 | 51.7850000 |
| C  | 49.7000000 | 76.7390000 | 52.5620000 |
| O  | 49.8900000 | 76.8100000 | 53.7990000 |
| O  | 48.9600000 | 77.5860000 | 52.0220000 |
| C  | 43.8670000 | 76.6810000 | 56.3140000 |
| N  | 45.1900000 | 76.3570000 | 55.7000000 |
| C  | 48.5880000 | 73.3340000 | 59.3590000 |
| C  | 48.8250000 | 74.3040000 | 58.2460000 |
| N  | 49.4880000 | 73.9580000 | 57.0890000 |
| C  | 48.5070000 | 75.6150000 | 58.1230000 |
| C  | 49.5590000 | 75.0120000 | 56.2950000 |
| N  | 48.9780000 | 76.0330000 | 56.9030000 |
| C  | 51.7700000 | 80.8190000 | 58.3910000 |
| C  | 50.8740000 | 80.1710000 | 57.3790000 |
| N  | 50.9650000 | 80.4300000 | 56.0290000 |
| C  | 49.8910000 | 79.2470000 | 57.5170000 |
| C  | 50.0690000 | 79.7070000 | 55.3800000 |
| N  | 49.4040000 | 78.9800000 | 56.2600000 |
| Mn | 47.7610000 | 77.2670000 | 55.1760000 |
| C  | 43.4500000 | 78.4730000 | 51.9620000 |
| O  | 42.3670000 | 78.1360000 | 52.6130000 |
| O  | 43.4350000 | 78.5020000 | 50.6490000 |
| C  | 44.6080000 | 78.7860000 | 52.6710000 |
| O  | 45.6340000 | 77.9690000 | 52.6300000 |
| C  | 44.6840000 | 80.0520000 | 53.4810000 |
| H  | 51.4611797 | 75.6103394 | 52.0148474 |
| H  | 49.9698608 | 74.6532006 | 52.1023949 |
| H  | 44.0000913 | 76.9184722 | 57.3781520 |
| H  | 43.4414633 | 77.5625696 | 55.8161418 |
| H  | 47.9271824 | 73.7831540 | 60.1114108 |
| H  | 48.1114417 | 72.4093998 | 58.9977375 |
| H  | 49.8893313 | 73.0449315 | 56.9059175 |
| H  | 47.9797010 | 76.2683867 | 58.8139606 |
| H  | 50.0209169 | 75.0775579 | 55.3052683 |
| H  | 51.4494433 | 80.5391388 | 59.4015450 |
| H  | 51.7380071 | 81.9180042 | 58.3196112 |
| H  | 51.6315422 | 81.0674199 | 55.6094795 |
| H  | 49.5131720 | 78.7657696 | 58.4147436 |
| H  | 49.9406092 | 79.6722483 | 54.2981578 |
| H  | 45.6414570 | 80.0826413 | 54.0137261 |
| H  | 43.8335756 | 80.1207116 | 54.1785573 |
| H  | 44.6121287 | 80.9215237 | 52.8058429 |
| H  | 45.0223208 | 76.1510172 | 54.7110977 |
| H  | 45.5024857 | 75.4683271 | 56.0966497 |
| H  | 50.2284108 | 75.7554757 | 50.7086389 |
| H  | 49.5271158 | 73.0541523 | 59.8627467 |
| H  | 43.1550515 | 75.8469225 | 56.2184595 |
| H  | 52.8174528 | 80.5008095 | 58.2683199 |
| H  | 41.6885261 | 77.9591107 | 51.9361226 |

### 3DKY

|    |            |            |             |
|----|------------|------------|-------------|
| C  | 10.9280000 | 17.9500000 | -47.7960000 |
| C  | 9.8980000  | 18.4670000 | -46.8760000 |
| N  | 9.1790000  | 19.6100000 | -47.1450000 |
| C  | 9.4670000  | 18.0270000 | -45.6730000 |
| C  | 8.3600000  | 19.8560000 | -46.1410000 |
| N  | 8.5070000  | 18.9060000 | -45.2440000 |
| C  | 9.8400000  | 21.5780000 | -51.7550000 |
| C  | 9.5730000  | 21.2630000 | -50.3220000 |
| O  | 9.4730000  | 22.2310000 | -49.5300000 |
| O  | 9.4390000  | 20.0580000 | -50.0060000 |
| C  | 15.8530000 | 19.0140000 | -47.7260000 |
| C  | 14.5730000 | 19.7620000 | -47.7220000 |
| N  | 13.7360000 | 19.7870000 | -48.8120000 |
| C  | 13.9770000 | 20.5090000 | -46.7800000 |
| C  | 12.6890000 | 20.5280000 | -48.5400000 |
| N  | 12.8110000 | 20.9770000 | -47.3050000 |
| C  | 11.8230000 | 19.5840000 | -41.9030000 |
| C  | 11.8180000 | 20.6910000 | -42.9190000 |
| N  | 12.5650000 | 21.8410000 | -42.7580000 |
| C  | 11.1360000 | 20.8410000 | -44.0720000 |
| C  | 12.3330000 | 22.6570000 | -43.7690000 |
| N  | 11.4660000 | 22.0800000 | -44.5790000 |
| C  | 3.9570000  | 17.7070000 | -43.2210000 |
| C  | 3.2410000  | 18.7420000 | -44.0570000 |
| O  | 2.2870000  | 18.4250000 | -44.7400000 |
| N  | 3.7270000  | 19.9760000 | -43.9940000 |
| C  | 3.0860000  | 21.1390000 | -44.6220000 |
| C  | 1.6160000  | 21.3080000 | -44.2440000 |
| O  | 0.8570000  | 21.9270000 | -45.0100000 |
| C  | 3.2840000  | 21.1670000 | -46.1560000 |
| C  | 4.6660000  | 21.5720000 | -46.5800000 |
| N  | 5.4270000  | 20.8270000 | -47.4530000 |
| C  | 5.4340000  | 22.6240000 | -46.2270000 |
| C  | 6.5960000  | 21.4170000 | -47.6270000 |
| N  | 6.6320000  | 22.5050000 | -46.8900000 |
| N  | 1.2430000  | 20.7870000 | -43.0630000 |
| C  | -0.1390000 | 20.8230000 | -42.5530000 |
| Mn | 10.5050000 | 22.0400000 | -47.1880000 |
| H  | 4.3274023  | 16.9144245 | -43.8868680 |
| H  | 3.0121768  | 20.1751825 | -46.5471849 |
| H  | 2.5352582  | 21.8707733 | -46.5504291 |
| H  | 5.2154215  | 23.4560755 | -45.5607005 |
| H  | 7.3747905  | 21.0648304 | -48.3073433 |
| H  | 3.5907712  | 22.0226691 | -44.1978951 |
| H  | -0.7321900 | 21.4103881 | -43.2649853 |
| H  | 11.9381995 | 18.2305145 | -47.4601942 |
| H  | 10.7388701 | 18.3705570 | -48.7937968 |
| H  | 9.7131655  | 17.1338079 | -45.1022164 |
| H  | 7.7190471  | 20.7250839 | -46.0133289 |
| H  | 7.9674373  | 18.8010623 | -44.3931612 |
| H  | 9.9672059  | 22.6511590 | -51.9465280 |
| H  | 10.7384589 | 21.0317865 | -52.0777729 |
| H  | 16.3425863 | 19.0999951 | -46.7476383 |
| H  | 16.5511812 | 19.4048983 | -48.4831943 |
| H  | 13.9116314 | 19.3017175 | -49.6845796 |
| H  | 14.3015437 | 20.7439604 | -45.7696845 |
| H  | 11.8416670 | 20.6579727 | -49.2176273 |
| H  | 11.3910188 | 19.9124945 | -40.9444643 |
| H  | 11.2248078 | 18.7418453 | -42.2738868 |
| H  | 13.1689564 | 22.0279145 | -41.9658436 |
| H  | 10.4589816 | 20.1530448 | -44.5679385 |

|   |            |            |             |
|---|------------|------------|-------------|
| H | 12.7840805 | 23.6390513 | -43.8978383 |
| H | 4.7892557  | 18.0945025 | -42.6140664 |
| H | 3.2206656  | 17.2360900 | -42.5540966 |
| H | -0.1753616 | 21.3001323 | -41.5627039 |
| H | -0.5515082 | 19.8051302 | -42.4898890 |
| H | 9.0074606  | 21.1937381 | -52.3618667 |
| H | 15.6998488 | 17.9427105 | -47.9311710 |
| H | 12.8403723 | 19.2114348 | -41.7065419 |
| H | 5.0946917  | 19.9941722 | -47.9251069 |
| H | 10.8945684 | 16.8529149 | -47.8577616 |
| H | 4.5275565  | 20.1536620 | -43.4047660 |
| H | 1.9288616  | 20.2668219 | -42.5354481 |
